# Supplementary material for: Selective transformations of complex molecules are enabled by aptameric protective groups
Source: Springer Nature journal article supplement (doi:10.1038/nchem.1402), 2012-07-20
Supplement: 41557_2012_BFnchem1402_MOESM15_ESM.mol [file 41557_2012_BFnchem1402_MOESM15_ESM.mol]

  ChemDraw07051206292D

 47 50  0  0  0  0  0  0  0  0999 V2000
   -2.5532   -2.9193    0.0000 C   0  0  0  0  0  0  0  0  0  0  0  0
   -2.5532   -3.7471    0.0000 C   0  0  0  0  0  0  0  0  0  0  0  0
   -1.8363   -4.1610    0.0000 C   0  0  0  0  0  0  0  0  0  0  0  0
   -1.1194   -3.7471    0.0000 C   0  0  0  0  0  0  0  0  0  0  0  0
   -1.1194   -2.9193    0.0000 O   0  0  0  0  0  0  0  0  0  0  0  0
   -1.8363   -2.5054    0.0000 C   0  0  0  0  0  0  0  0  0  0  0  0
   -3.2676   -2.5068    0.0000 N   0  0  0  0  0  0  0  0  0  0  0  0
   -3.2676   -4.1596    0.0000 O   0  0  0  0  0  0  0  0  0  0  0  0
   -1.8363   -4.9860    0.0000 O   0  0  0  0  0  0  0  0  0  0  0  0
   -0.4049   -4.1596    0.0000 C   0  0  0  0  0  0  0  0  0  0  0  0
    0.3095   -3.7471    0.0000 N   0  0  0  0  0  0  0  0  0  0  0  0
   -1.6206   -0.2236    0.0000 C   0  0  0  0  0  0  0  0  0  0  0  0
   -1.3576   -1.0085    0.0000 C   0  0  0  0  0  0  0  0  0  0  0  0
   -0.5298   -1.0008    0.0000 C   0  0  0  0  0  0  0  0  0  0  0  0
   -0.2813   -0.2112    0.0000 C   0  0  0  0  0  0  0  0  0  0  0  0
   -0.9555    0.2691    0.0000 O   0  0  0  0  0  0  0  0  0  0  0  0
   -0.0387   -1.6638    0.0000 O   0  0  0  0  0  0  0  0  0  0  0  0
   -2.4076    0.0240    0.0000 C   0  0  0  0  0  0  0  0  0  0  0  0
    0.5009    0.0510    0.0000 O   0  0  0  0  0  0  0  0  0  0  0  0
   -3.0156   -0.5337    0.0000 O   0  0  0  0  0  0  0  0  0  0  0  0
    1.0855    0.6331    0.0000 C   0  0  0  0  0  0  0  0  0  0  0  0
    1.8846    0.4171    0.0000 C   0  0  0  0  0  0  0  0  0  0  0  0
    2.4712    1.0012    0.0000 C   0  0  0  0  0  0  0  0  0  0  0  0
    2.2587    1.8013    0.0000 C   0  0  0  0  0  0  0  0  0  0  0  0
    1.4595    2.0172    0.0000 C   0  0  0  0  0  0  0  0  0  0  0  0
    0.8730    1.4331    0.0000 C   0  0  0  0  0  0  0  0  0  0  0  0
    2.0965   -0.3802    0.0000 O   0  0  0  0  0  0  0  0  0  0  0  0
    0.0765    1.6483    0.0000 O   0  0  0  0  0  0  0  0  0  0  0  0
    1.2477    2.8145    0.0000 N   0  0  0  0  0  0  0  0  0  0  0  0
    3.2676    0.7860    0.0000 N   0  0  0  0  0  0  0  0  0  0  0  0
   -0.5116    2.2269    0.0000 C   0  0  0  0  0  0  0  0  0  0  0  0
   -0.3038    3.0282    0.0000 O   0  0  0  0  0  0  0  0  0  0  0  0
   -0.8939    3.6088    0.0000 C   0  0  0  0  0  0  0  0  0  0  0  0
   -1.6917    3.3880    0.0000 C   0  0  0  0  0  0  0  0  0  0  0  0
   -1.8994    2.5868    0.0000 C   0  0  0  0  0  0  0  0  0  0  0  0
   -1.3094    2.0062    0.0000 C   0  0  0  0  0  0  0  0  0  0  0  0
   -1.5164    1.2076    0.0000 N   0  0  0  0  0  0  0  0  0  0  0  0
   -2.2798    3.9667    0.0000 O   0  0  0  0  0  0  0  0  0  0  0  0
   -2.6946    2.3668    0.0000 O   0  0  0  0  0  0  0  0  0  0  0  0
   -0.6868    4.4074    0.0000 C   0  0  0  0  0  0  0  0  0  0  0  0
   -1.2749    4.9860    0.0000 N   0  0  0  0  0  0  0  0  0  0  0  0
   -1.8363   -1.6804    0.0000 O   0  0  0  0  0  0  0  0  0  0  0  0
    1.0240   -4.1596    0.0000 C   0  0  0  0  0  0  0  0  0  0  0  0
    1.0240   -4.9846    0.0000 O   0  0  0  0  0  0  0  0  0  0  0  0
    1.7385   -3.7471    0.0000 C   0  0  0  0  0  0  0  0  0  0  0  0
    2.4530   -4.1596    0.0000 C   0  0  0  0  0  0  0  0  0  0  0  0
    1.7385   -2.9221    0.0000 C   0  0  0  0  0  0  0  0  0  0  0  0
  1  2  1  0      
  2  3  1  0      
  3  4  1  0      
  4  5  1  0      
  5  6  1  0      
  6  1  1  0      
  6 42  1  1      
  1  7  1  1      
  2  8  1  6      
  3  9  1  1      
  4 10  1  1      
 10 11  1  0      
 12 13  1  0      
 13 14  1  0      
 14 15  1  0      
 15 16  1  0      
 16 12  1  0      
 13 42  1  6      
 14 17  1  6      
 12 18  1  1      
 15 19  1  1      
 18 20  1  0      
 21 19  1  1      
 21 22  1  0      
 22 23  1  0      
 23 24  1  0      
 24 25  1  0      
 25 26  1  0      
 26 21  1  0      
 22 27  1  6      
 26 28  1  6      
 25 29  1  1      
 23 30  1  1      
 31 28  1  6      
 31 32  1  0      
 32 33  1  0      
 33 34  1  0      
 34 35  1  0      
 35 36  1  0      
 36 31  1  0      
 36 37  1  6      
 34 38  1  6      
 35 39  1  1      
 33 40  1  1      
 40 41  1  0      
 11 43  1  0      
 43 44  2  0      
 43 45  1  0      
 45 46  1  0      
 45 47  1  0      
M  END
