# Supplementary material for: Selective transformations of complex molecules are enabled by aptameric protective groups
Source: Springer Nature journal article supplement (doi:10.1038/nchem.1402), 2012-07-20
Supplement: 41557_2012_BFnchem1402_MOESM25_ESM.mol [file 41557_2012_BFnchem1402_MOESM25_ESM.mol]

  ChemDraw07051206292D

 53 57  0  0  0  0  0  0  0  0999 V2000
   -1.2001   -0.2967    0.0000 C   0  0  0  0  0  0  0  0  0  0  0  0
   -0.9379   -1.0790    0.0000 C   0  0  0  0  0  0  0  0  0  0  0  0
   -0.1129   -1.0713    0.0000 C   0  0  0  0  0  0  0  0  0  0  0  0
    0.1347   -0.2844    0.0000 C   0  0  0  0  0  0  0  0  0  0  0  0
   -0.5372    0.1944    0.0000 O   0  0  0  0  0  0  0  0  0  0  0  0
    0.3765   -1.7320    0.0000 O   0  0  0  0  0  0  0  0  0  0  0  0
   -1.9844   -0.0499    0.0000 C   0  0  0  0  0  0  0  0  0  0  0  0
    0.9143   -0.0230    0.0000 O   0  0  0  0  0  0  0  0  0  0  0  0
   -2.5903   -0.6057    0.0000 O   0  0  0  0  0  0  0  0  0  0  0  0
    1.4970    0.5571    0.0000 C   0  0  0  0  0  0  0  0  0  0  0  0
    2.2934    0.3419    0.0000 C   0  0  0  0  0  0  0  0  0  0  0  0
    2.8780    0.9240    0.0000 C   0  0  0  0  0  0  0  0  0  0  0  0
    2.6662    1.7214    0.0000 C   0  0  0  0  0  0  0  0  0  0  0  0
    1.8697    1.9366    0.0000 C   0  0  0  0  0  0  0  0  0  0  0  0
    1.2851    1.3545    0.0000 C   0  0  0  0  0  0  0  0  0  0  0  0
    2.5045   -0.4528    0.0000 O   0  0  0  0  0  0  0  0  0  0  0  0
    0.4914    1.5690    0.0000 O   0  0  0  0  0  0  0  0  0  0  0  0
    1.6586    2.7312    0.0000 N   0  0  0  0  0  0  0  0  0  0  0  0
    3.6718    0.7095    0.0000 N   0  0  0  0  0  0  0  0  0  0  0  0
   -0.0947    2.1456    0.0000 C   0  0  0  0  0  0  0  0  0  0  0  0
    0.1123    2.9442    0.0000 O   0  0  0  0  0  0  0  0  0  0  0  0
   -0.4758    3.5228    0.0000 C   0  0  0  0  0  0  0  0  0  0  0  0
   -1.2709    3.3028    0.0000 C   0  0  0  0  0  0  0  0  0  0  0  0
   -1.4779    2.5042    0.0000 C   0  0  0  0  0  0  0  0  0  0  0  0
   -0.8898    1.9256    0.0000 C   0  0  0  0  0  0  0  0  0  0  0  0
   -1.0962    1.1297    0.0000 N   0  0  0  0  0  0  0  0  0  0  0  0
   -1.8570    3.8795    0.0000 O   0  0  0  0  0  0  0  0  0  0  0  0
   -2.2704    2.2850    0.0000 O   0  0  0  0  0  0  0  0  0  0  0  0
   -0.2694    4.3187    0.0000 C   0  0  0  0  0  0  0  0  0  0  0  0
   -0.8555    4.8954    0.0000 N   0  0  0  0  0  0  0  0  0  0  0  0
   -1.9226   -3.8688    0.0000 C   0  0  0  0  0  0  0  0  0  0  0  0
   -2.7468   -3.8314    0.0000 C   0  0  0  0  0  0  0  0  0  0  0  0
   -3.1265   -3.0990    0.0000 C   0  0  0  0  0  0  0  0  0  0  0  0
   -2.6821   -2.4040    0.0000 O   0  0  0  0  0  0  0  0  0  0  0  0
   -1.8579   -2.4413    0.0000 C   0  0  0  0  0  0  0  0  0  0  0  0
   -1.4782   -3.1737    0.0000 C   0  0  0  0  0  0  0  0  0  0  0  0
   -1.4150   -1.7486    0.0000 O   0  0  0  0  0  0  0  0  0  0  0  0
   -3.1897   -4.5242    0.0000 O   0  0  0  0  0  0  0  0  0  0  0  0
   -3.9479   -3.0618    0.0000 C   0  0  0  0  0  0  0  0  0  0  0  0
   -1.5442   -4.5988    0.0000 O   0  0  0  0  0  0  0  0  0  0  0  0
   -4.3263   -2.3319    0.0000 N   0  0  0  0  0  0  0  0  0  0  0  0
   -0.6568   -3.2110    0.0000 N   0  0  0  0  0  0  0  0  0  0  0  0
    0.0540   -3.6297    0.0000 C   0  0  0  0  0  0  0  0  0  0  0  0
    0.7721   -3.2234    0.0000 N   0  0  0  0  0  0  0  0  0  0  0  0
    1.4805   -3.6407    0.0000 C   0  0  0  0  0  0  0  0  0  0  0  0
    0.0469   -4.4519    0.0000 O   0  0  0  0  0  0  0  0  0  0  0  0
    2.1986   -3.2344    0.0000 C   0  0  0  0  0  0  0  0  0  0  0  0
    2.9094   -3.6531    0.0000 C   0  0  0  0  0  0  0  0  0  0  0  0
    2.9023   -4.4781    0.0000 C   0  0  0  0  0  0  0  0  0  0  0  0
    2.1842   -4.8844    0.0000 C   0  0  0  0  0  0  0  0  0  0  0  0
    1.4734   -4.4657    0.0000 C   0  0  0  0  0  0  0  0  0  0  0  0
    3.6107   -4.8954    0.0000 O   0  0  0  0  0  0  0  0  0  0  0  0
    4.3263   -4.4905    0.0000 C   0  0  0  0  0  0  0  0  0  0  0  0
  1  2  1  0      
  2  3  1  0      
  3  4  1  0      
  4  5  1  0      
  5  1  1  0      
  2 37  1  6      
  3  6  1  6      
  1  7  1  1      
  4  8  1  1      
  7  9  1  0      
 10  8  1  1      
 10 11  1  0      
 11 12  1  0      
 12 13  1  0      
 13 14  1  0      
 14 15  1  0      
 15 10  1  0      
 11 16  1  6      
 15 17  1  6      
 14 18  1  1      
 12 19  1  1      
 20 17  1  6      
 20 21  1  0      
 21 22  1  0      
 22 23  1  0      
 23 24  1  0      
 24 25  1  0      
 25 20  1  0      
 25 26  1  6      
 23 27  1  6      
 24 28  1  1      
 22 29  1  1      
 29 30  1  0      
 31 32  1  0      
 32 33  1  0      
 33 34  1  0      
 34 35  1  0      
 35 36  1  0      
 36 31  1  0      
 35 37  1  6      
 36 42  1  6      
 32 38  1  6      
 33 39  1  6      
 31 40  1  1      
 39 41  1  0      
 42 43  1  0      
 43 44  1  0      
 44 45  1  0      
 43 46  2  0      
 45 47  2  0      
 47 48  1  0      
 48 49  2  0      
 49 50  1  0      
 50 51  2  0      
 51 45  1  0      
 49 52  1  0      
 52 53  1  0      
M  END
